# Supplementary material for: Comparative Genomics to Delineate Pathogenic Potential in Non-O157 Shiga Toxin-Producing Escherichia coli (STEC) from Patients with and without Haemolytic Uremic Syndrome (HUS) in Norway
Source: PLoS One. 2014 Oct 31;9(10):e111788. doi: 10.1371/journal.pone.0111788 (PMC4216125; doi:10.1371/journal.pone.0111788)
Supplement: File S1 — Contains Table S1. Information on 95 Norwegian non-O157 STEC genomes sequenced and analysed in this study. (XLSX) [file pone.0111788.s003.xlsx]

## Sheet: Sheet1
Table S1. Information on 95 Norwegian non-O157 STEC genomes sequenced and analyzed in this study.
			Strain ID	O-type	Lab_stx16	Lab_stx26	Lab_eae6	Pred_stx17	Pred_stx27	Pred_eae7	stx1 subtype	stx2 subtype	MLVA Allele8	Source	Clinic	HUS-associated	Outbreak	Sex	Age	Accession No.	Sequencing method	Contigs
LEE positive STEC n=54	LEE positive and stx2 positive STEC n=331 (35)	HUS and HUS-associated STEC n=231 (25)	FHI3	26	0	1	1	0	1	1		stx2a	6-1-0-8-3-5-1-6-11-15	Human faeces	Unknown	1	1	F	31	ERS480135	Illumina PE9	130
			FHI4	26	0	1	1	0	1	1		stx2a	6-1-0-8-3-5-1-6-11-15	Human faeces	HUS	1	1	F	4	ERS480136	Illumina PE, MP10	35
			FHI24	26	0	1	1	0	1	1		stx2a	6-1-0-8-3-4-1	Human faeces	HUS	1	0	F	2	ERS480154	Illumina PE, MP	42
			FHI27	26	1	1	1	0	1	1		stx2a	6-1-0-8-3-4-1	Human faeces	HUS	1	0	M	1	ERS480156	Illumina PE, MP	27
			FHI79	26	0	1	1	0	1	1		stx2a	6-0-0-8-3-4-1-6-13-12	Human faeces	HUS	1	0	M	0	ERS480204	Illumina PE, MP	28
			FHI8	86	0	1	1	0	1	1		stx2a	6-3-0-8-3-7-1	Human	HUS	1	0	F	1	ERS480140	Illumina PE, MP	33
			FHI7	103	0	1	1	0	1	1		stx2a	7-3-0-5-0-8-1-16-9-11	Human faeces	HUS	1	0	F	1	ERS480139	Illumina PE, MP	30
			FHI9	103	0	1	1	0	1	1		stx2a	7-3-0-5-0-3-1-16-9-11	Human faeces	HUS	1	0	F	0	ERS480141	Illumina PE, MP	34
			FHI102,3	103	0	0	1	0	0	1			7-3-0-5-0-7-1-16-9-12	Human faeces	HUS	1	2	F	4	-	Illumina PE	ND
			FHI113	103	0	0	1	0	0	1			7-3-0-5-0-7-1-16-9-12	Human faeces	HUS	1	2	F	2	ERS480142	Illumina PE, MP	25
			FHI12	103	0	1	1	0	1	1		stx2a	7-3-0-5-0-7-1-16-9-12	Human faeces	HUS	1	2	F	4	ERS480143	Illumina PE, MP	31
			FHI133	103	0	0	1	0	0	1			7-3-0-5-0-7-1	Human faeces	HUS	1	2	F	1	ERS480144	Illumina PE	120
			FHI143	103	0	1	1	0	0	1			7-3-0-5-0-7-1	Human faeces	HUS	1	2	F	2	ERS480145	Illumina PE, MP	29
			FHI153	103	0	0	1	0	0	1			7-3-0-5-0-7-1	Human faeces	HUS	1	2	F	1	ERS480146	Illumina PE, MP	42
			FHI163	103	0	0	1	0	0	1			7-3-0-5-0-7-1-16-9-11	Fermented sausage	NA	1	2	NA	NA	ERS480147	Illumina PE	129
			FHI213	103	0	0	1	0	0	1			7-3-0-5-0-5-1	Human faeces	HUS	1	2	M	1	ERS480151	Illumina PE, MP	32
			FHI6	111	1	1	1	1	1	1	stx1a	stx2a	6-3-0-5-3-10-1	Human faeces	HUS	1	0	F	1	ERS480138	Illumina PE, MP	33
			FHI43	121	0	1	1	0	1	1		stx2a	6-3-0-5-3-6-1-6-11-13	Human faeces	Gastroenteritis	1	3	M	1	ERS480171	Illumina PE, MP	17
			FHI48	121	0	1	1	0	1	1		stx2a	6-3-0-5-3-6-1-6-11-16	Human faeces	HUS	1	3	F	1	ERS480175	Illumina PE, MP	34
			FHI62	121	0	1	1	0	1	1		stx2a	6-3-0-5-3-5-1-6-11-15	Human faeces	Gastroenteritis	1	3	F	2	ERS480187	Illumina PE, MP	23
			FHI83	121	0	1	1	0	1	1		stx2a	8-0-0-6-3-6-1-6-11-0	Human faeces	HUS	1	0	F	1	ERS480207	Illumina PE, MP	27
			FHI25	145	0	1	1	0	1	1		stx2a	5-3-0-8-4-1-1-16-8-12	Human faeces	HUS	1	0	M	2	ERS480155	Illumina PE, MP	27
			FHI58	145	0	1	1	0	1	1		stx2a	5-3-0-8-4-1-1-16-9	Human faeces	HUS	1	4	M	1	ERS480183	Illumina PE, MP	28
			FHI63	145	0	1	1	0	1	1		stx2a	5-3-0-8-4-1-1-16-9	Human faeces	HUS	1	4	M	1	ERS480188	Illumina PE, MP	43
			St. Olav1044	145	0	1	1	0	1	1		stx2a	5-3-0-8-4-1-1-16-9	Human faeces	Asymptomatic	1	4	F	1	ERS480228	Pacific Biosciences	78
			FHI5	0	1	0	0	1	1	1	stx1a	stx2c	6-10-3-5-4-7-2-6-9	Human faeces	Gastroenteritis	0	0	M	4	ERS480137	Illumina PE	89
			FHI66	0	1	1	1	1	1	1	stx1c	stx2a	7-3-0-5-4-7-1-16-11	Human faeces	Asymptomatic	0	0	M	5	ERS480191	Illumina PE, MP	32
			FHI85	0	1	1	1	1	1	1	stx1a	stx2c	5-3-0-8-3-4-1-6-20-0	Human faeces	ND	0	0	F	69	ERS480209	Illumina PE, MP	33
			FHI101	0	0	1	1	0	1	1		stx2d	5-1-0-8-3-9-1-64-0-13	Human faeces	Gastroenteritis	0	0	F	1	ERS480224	Illumina PE	152
			FHI36	26	0	1	1	0	1	1		stx2a	6-1-0-8-3-5-1-6-16	Human faeces	Bloody diarrhoea	0	0	F	1	ERS480164	Illumina PE	137
			FHI39	26	0	1	1	0	1	1		stx2a	6-1-0-8-3-5-1-6-15	Sheep faeces	NA	0	0	NA	NA	ERS480167	Illumina PE	133
			FHI2	26	0	1	1	0	0	1			6-0-0-8-3-4-1-6-15-10	Human faeces	ND	0	0	F	36	ERS480134	Illumina PE	157
			FHI19	104	0	1	0	0	1	1		stx2a	6-3-10-8-3-6-1-6-6-0	Human faeces	Gastroenteritis	0	0	M	74	ERS480149	Illumina PE	283
			FHI82	145	0	1	1	0	1	1		stx2a	7-0-0-8-3-2-1-35-0-0	Human faeces	Bloody diarrhoea	0	0	M	21	ERS480206	Illumina PE, MP	29
			FHI95	145	0	1	1	0	1	1		stx2a	7-3-0-8-3-2-1-35-0-0	Human faeces	ND	0	0	F	2	ERS480218	Illumina PE	100
			FHI51	0	1	0	1	1	0	1	stx1a		6-3-0-8-3-7-1-6-7	Human faeces	ND	0	0	F	3	ERS480178	Illumina PE	189
			FHI64	0	1	0	1	1	0	1	stx1a		5-3-0-5-4-5-1-6-10	Human faeces	Bloody diarrhoea	0	0	F	2	ERS480189	Illumina PE	111
			FHI74	0	1	0	1	1	0	1	stx1a		6-3-0-8-3-5-1-6-0-13	Human faeces	ND	0	0	M	3	ERS480199	Illumina PE, MP	23
			FHI90	0	1	0	1	1	0	1	stx1a		6-0-0-8-3-6-1-6-10-11	Human faeces	ND	0	0	F	1	ERS480214	Illumina PE, MP	31
			FHI1	26	1	0	1	1	0	1	stx1a		6-0-0-8-3-5-1-6-23	Human faeces	ND	0	0	M	2	ERS480133	Illumina PE	151
			FHI20	26	1	0	1	1	0	1	stx1a		6-1-0-8-3-5-1-6-23	Human faeces	Gastroenteritis	0	0	F	1	ERS480150	Illumina PE, MP	26
			FHI46	26	1	0	1	1	0	1	stx1a		6-0-0-8-3-6-1-6-40-13	Human faeces	Bloody diarrhoea	0	0	F	22	ERS480173	Illumina PE	162
			FHI47	26	1	0	1	1	0	1	stx1a		6-1-0-5-3-9-1-6-21	Human faeces	Bloody diarrhoea	0	0	F	24	ERS480174	Illumina PE	211
			FHI50	26	1	0	1	1	0	1	stx1a		6-0-0-8-3-6-1-6-40	Human faeces	Bloody diarrhoea	0	0	F	42	ERS480177	Illumina PE	194
			FHI60	26	1	0	1	1	0	1	stx1a		6-0-0-8-3-6-1-6-22	Human faeces	Bloody diarrhoea	0	0	M	32	ERS480185	Illumina PE	252
			FHI61	26	1	0	1	1	0	1	stx1a		6-0-0-8-3-4-1-6-20	Human faeces	Gastroenteritis	0	0	F	1	ERS480186	Illumina PE	447
			FHI70	26	1	0	1	1	0	1	stx1a		6-0-0-8-3-15-1-0-39-16	Human faeces	Annet	0	0	M	0	ERS480195	Illumina PE, MP	40
			FHI77	26	1	0	1	1	0	1	stx1a		6-0-0-8-3-6-1-6-0-17	Human faeces	Bloody diarrhoea	0	0	M	9	ERS480202	Illumina PE	246
			FHI78	26	1	0	1	1	0	1	stx1a		6-0-0-8-3-7-1-6-21-15	Human faeces	Bloody diarrhoea	0	0	M	0	ERS480203	Illumina PE	243
			FHI56	103	1	0	1	1	0	1	stx1a		6-3-0-8-3-5-7-6-7	Human faeces	Gastroenteritis	0	0	M	0	ERS480182	Illumina PE	197
			FHI75	103	1	0	1	1	0	1	stx1a		6-3-0-8-3-5-7-6-7-0	Human faeces	ND	0	0	M	6	ERS480200	Illumina PE, MP	26
			FHI97	103	1	0	1	1	0	1	stx1a		6-3-0-8-3-6-1-6-10-15	Human faeces	Bloody diarrhoea	0	0	F	1	ERS480220	Illumina PE, MP	46
			St. Olav143	103	1	0	1	1	0	1	stx1a		6-3-0-8-3-4-7-6-7-0	Human faeces	Asymptomatic	0	0	F	1	ERS480226	Illumina PE	102
			FHI67	111	1	0	1	1	0	1	stx1a		6-3-0-5-3-5-1-95-19	Human faeces	Gastroenteritis	0	0	M	0	ERS480192	Illumina PE	129
			FHI84	145	1	0	1	1	0	1	stx1a		1-0-0-8-3-7-1-35-0-0	Human faeces	Bloody diarrhoea	0	0	F	65	ERS480208	Illumina PE	150
			FHI87	145	1	0	1	1	0	1	stx1a		1-3-0-8-3-6-1-35-0-0	Human faeces	Asymptomatic	0	0	M	1	ERS480211	Illumina PE, MP	25
LEE negative STEC n=41			FHI31	0	0	1	0	0	1	0		stx2b	6-3-0-8-3-6-1-6-6	Human faeces	ND	0	0	F	56	ERS480160	Illumina PE	87
			FHI38	0	0	1	0	0	0	0			7-0-0-8-3-7-1-0-0	Sheep faeces	NA	0	0	NA	NA	ERS480166	Illumina PE	47
			FHI53	0	0	1	0	0	1	0		stx2a	6-3-0-8-3-2-1-6-14	Human faeces	ND	0	0	M	5	ERS480180	Illumina PE	54
			FHI89	0	0	1	0	0	1	0		stx2a	6-3-0-8-3-11-1-6-9-0	Human faeces	Gastroenteritis	0	0	M	10	ERS480213	Illumina PE, MP	22
			FHI99	0	0	1	0	0	1	0		stx2a	5-3-0-8-3-14-1-6-0-0	Human faeces	Gastroenteritis	0	0	F	90	ERS480222	Illumina PE, MP	32
			FHI100	0	0	1	0	0	1	0		stx2b	6-3-0-8-3-10-1-6-6-0	Human faeces	ND	0	0	M	58	ERS480223	Illumina PE, MP	32
			FHI32	0	1	1	0	1	1	0	stx1c	stx2b	5-0-4-8-4-4-1-6-0	Human faeces	ND	0	0	F	51	ERS480161	Illumina PE	75
			FHI37	0	1	1	0	1	1	0	stx1c	stx2b	12-3-0-8-3-8-1-6-8	Sheep faeces	NA	0	0	NA	NA	ERS480165	Illumina PE	103
			FHI92	0	1	1	0	1	1	0	stx1c	stx2b	6-14-0-8-3-3-1-16-6-0	Human faeces	Bloody diarrhoea	0	0	M	72	ERS480216	Illumina PE, MP	24
			FHI98	2	0	1	0	0	1	0		stx2b	5-0-0-8-4-2-1-16-0-0	Human faeces	Gastroenteritis	0	0	F	84	ERS480221	Illumina PE, MP	31
			FHI28	8	0	1	0	0	1	0		stx2c	6-3-0-8-3-8-1-6-11	Human faeces	Gastroenteritis	0	0	F	68	ERS480157	Illumina PE, MP	21
			FHI86	8	0	1	0	0	1	0		stx2e	6-3-0-8-3-4-1-6-0-0	Human faeces	Gastroenteritis	0	0	F	20	ERS480210	Illumina PE	46
			FHI42	84	0	1	0	0	1	0		stx2b	6-3-0-8-3-7-1-6-6	Human faeces	ND	0	0	F	4	ERS480170	Illumina PE, MP	33
			FHI59	91	0	1	0	0	1	0		stx2b	6-3-0-8-3-4-1-6-7	Human faeces	ND	0	ND	ND	ND	ERS480184	Illumina PE, MP	22
			FHI81	91	1	1	0	1	1	0	stx1a	stx2b	7-3-0-8-1-6-1-6-7-0	Human faeces	Gastroenteritis	0	0	F	1	ERS480205	Illumina PE	143
			FHI1025	104	0	1	0	0	1	0		stx2a	6-3-0-8-3-10-1-6-6-0	Human faeces	Bloody diarrhoea	0	0	M	40	ERS480225	Illumina PE, MP	31
			FHI88	111	0	1	0	0	1	0		stx2a	6-3-0-10-3-6-1-6-6-0	Human faeces	Bloody diarrhoea	0	0	F	1	ERS480212	Illumina PE	129
			FHI35	113	0	1	0	0	1	0		stx2d	6-3-0-8-3-8-1-6-6	Minced meat	NA	0	0	NA	NA	ERS480163	Illumina PE	49
			FHI41	113	0	1	0	0	1	0		stx2d	5-0-8-8-3-6-1-6-0	Human faeces	ND	0	0	F	71	ERS480169	Illumina PE	98
			FHI30	113	1	1	0	1	1	0	stx1c	stx2b	5-0-5-8-3-6-1-6-0	Human faeces	ND	0	0	F	37	ERS480159	Illumina PE, MP	28
			FHI71	128	0	1	0	0	1	0		stx2b	2-3-0-1-3-6-1-6-13-0	Human faeces	ND	0	0	F	0	ERS480196	Illumina PE, MP	27
			FHI49	146	1	1	0	1	1	0	stx1c	stx2b	6-3-0-8-3-5-7-0-7	Human faeces	Asymptomatic	0	0	F	4	ERS480176	Illumina PE	102
			FHI22	146	1	0	0	1	1	0	stx1c	stx2b	6-3-0-8-3-2-1-0-7	Human faeces	Asymptomatic	0	0	F	31	ERS480152	Illumina PE	101
			FHI65	146	1	1	0	1	1	0	stx1a	stx2b	6-3-0-8-3-6-1-6-7-0	Human faeces	Bloody diarrhoea	0	0	F	55	ERS480190	Illumina PE, MP	26
			FHI40	0	1	0	0	1	0	0	stx1d		6-15-0-8-3-1-1-6-3	Human faeces	Gastroenteritis	0	0	M	2	ERS480168	Illumina PE, MP	32
			FHI45	0	1	0	0	1	0	0	stx1a		6-3-0-8-3-13-1-6-7	Human faeces	Gastroenteritis	0	0	M	2	ERS480172	Illumina PE	71
			FHI54	0	1	0	0	1	0	0	stx1c		6-13-0-8-3-3-1-16-6	Human faeces	Gastroenteritis	0	0	M	3	ERS480181	Illumina PE	70
			FHI69	0	1	0	0	1	0	0	stx1c		8-3-0-8-3-5-1-6-0-0	Human faeces	ND	0	0	M	0	ERS480194	Illumina PE	79
			FHI73	0	1	0	0	0	0	0			7-16-0-8-3-2-1-55-3-0	Human faeces	ND	0	0	F	1	ERS480198	Illumina PE	62
			FHI91	0	1	0	0	0	0	0			5-3-7-8-3-3-1-0-7-0	Human faeces	Gastroenteritis	0	0	F	45	ERS480215	Illumina PE	95
			FHI96	0	1	0	0	1	0	0	stx1a		7-3-0-8-3-10-1-6-9-0	Human faeces	Gastroenteritis	0	0	F	68	ERS480219	Illumina PE	123
			FHI17	26	1	0	1	0	0	0			6-0-0-8-3-7-1-0-6-0	Human faeces	ND	0	0	F	1	ERS480148	Illumina PE	65
			FHI23	76	1	0	0	1	0	0	stx1c		6-0-0-8-3-9-1-6-0	Human faeces	Gastroenteritis	0	0	F	2	ERS480153	Illumina PE, MP	33
			St. Olav172	103	1	0	0	1	0	0	stx1a		6-3-0-8-3-4-7-6-7-0	Human faeces	ND	0	0	F	0	ERS480227	Illumina PE	101
			FHI34	104	1	0	0	1	0	0	stx1c		6-3-0-8-3-5-1-6-7	Human faeces	Bloody diarrhoea	0	0	M	0	ERS480162	Illumina PE, MP	26
			FHI52	104	1	0	0	1	0	0	stx1c		6-3-0-8-3-4-1-6-7	Human faeces	Gastroenteritis	0	0	F	11	ERS480179	Illumina PE	171
			FHI68	117	1	0	0	1	0	0	stx1a		5-0-0-8-3-5-1-0-37-0	Human faeces	Gastroenteritis	0	0	M	44	ERS480193	Illumina PE	171
			FHI72	117	1	0	0	1	0	0	stx1a		5-0-0-8-3-6-1-0-36-0	Human faeces	Bloody diarrhoea	0	0	F	22	ERS480197	Illumina PE, MP	34
			FHI76	117	1	0	0	1	0	0	stx1a		5-0-0-8-3-5-1-6-36-15	Human faeces	Gastroenteritis	0	0	F	32	ERS480201	Illumina PE	178
			FHI93	117	1	0	0	1	0	0	stx1a		5-0-0-8-3-6-1-0-37-0	Human faeces	Gastroenteritis	0	0	F	45	ERS480217	Illumina PE	162
			FHI29	118	1	0	0	1	0	0	stx1a		5-1-0-8-4-4-1-6-7-0	Human faeces	Gastroenteritis	0	0	M	1	ERS480158	Illumina PE, MP	24
			Strain ID	O-type	stx1	stx2	eae						E. coli phylogroup			HUS-associated				Accession No.		Contigs
Reference strains			K-12 MG1655	16	0	0	0						A			0				U00096.3		1
			B str. REL606	7	0	0	0						A			0				CP000819.1		1
			IAI1	8	0	0	0						B1			0				CU928160.2		1
			O104:H4 str. 2011C-3493	104	0	1	0						B1			1				CP003289.1		1
			O103:H2 str. 12009	103	1	1	1						B1			0				AP010958.1		1
			O83:H1 str. NRG 857C	83	0	0	0						B2			0				CP001855.1		1
			ED1a	81	0	0	0						B2			0				CU928162.2		1
			UTI89	0	0	0	0						B2			0				CP000243.1		1
			UMN026	17	0	0	0						D			0				CU928163.2		1
			042	O44	0	0	0						D			0				FN554766.1		1
			O157:H7 str. Sakai	157	1	1	1						E			1				BA000007		1
			O55:H7 str. CB9615	55	0	0	1						E			0				CP001846.1		1
			IAI39	7	0	0	0						F			0				CU928164.2		1
			SMS-3-5	19	0	0	0						F			0				CP000970.1		1
